# Supplementary material
Source: PubMed Central journal article supplement (PMC11629799)

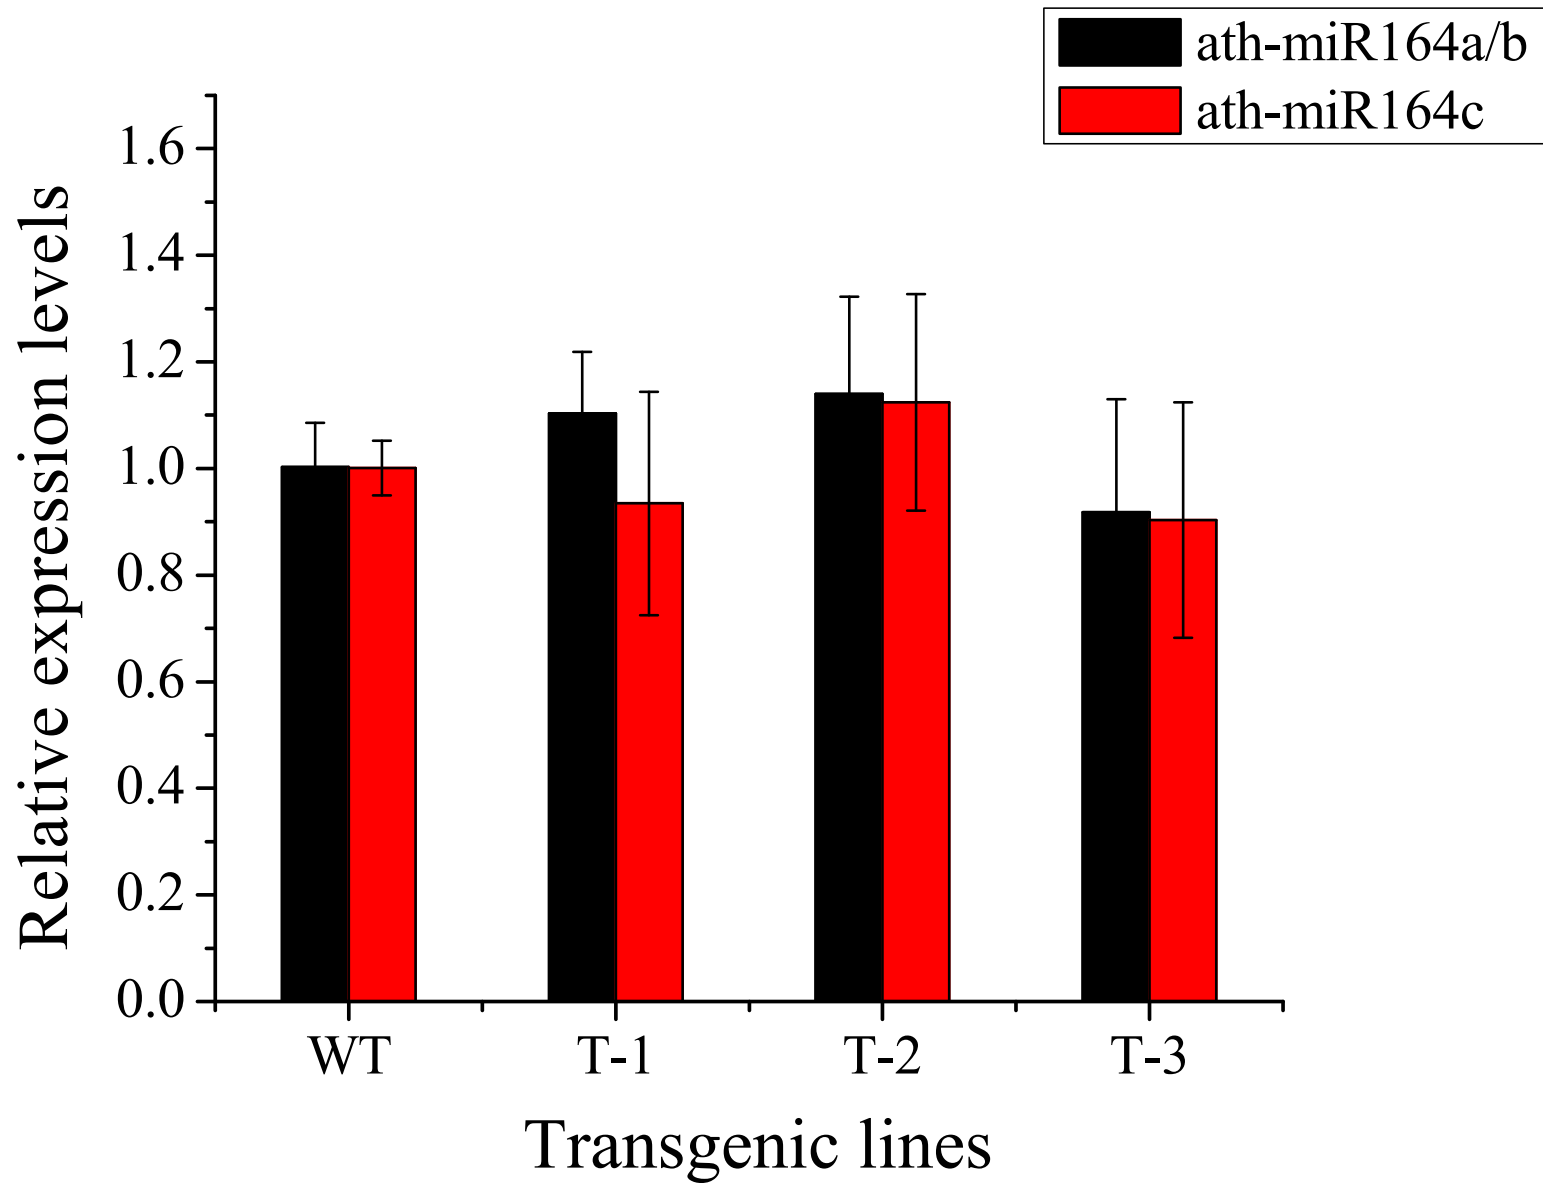

Supplement: PBI-18-207-s003.pdf [file PBI-18-207-s003.pdf]
