# Supplementary material
Source: PubMed Central journal article supplement (PMC11629799)

**A**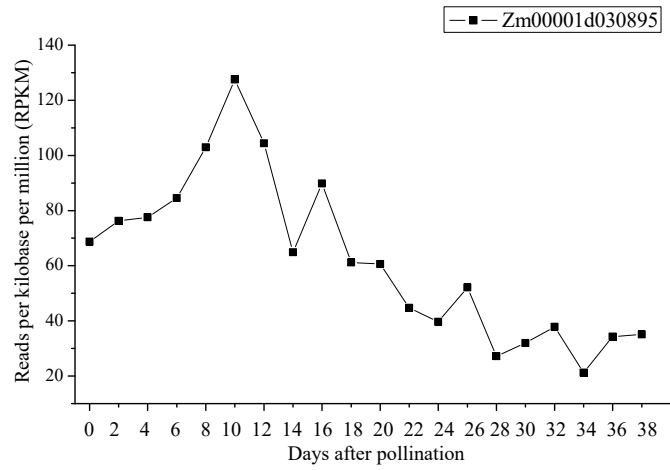**B**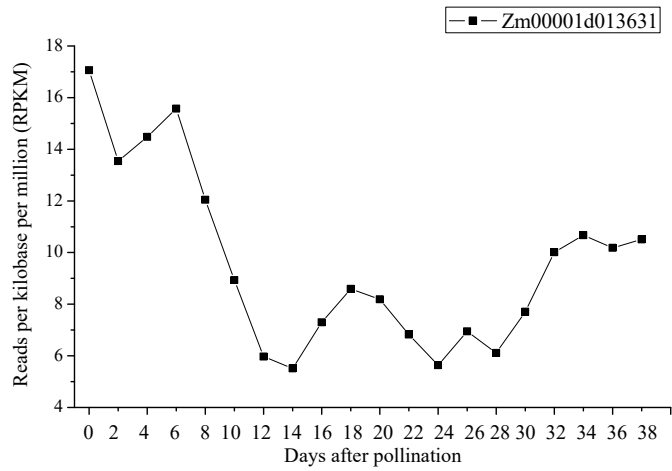**C**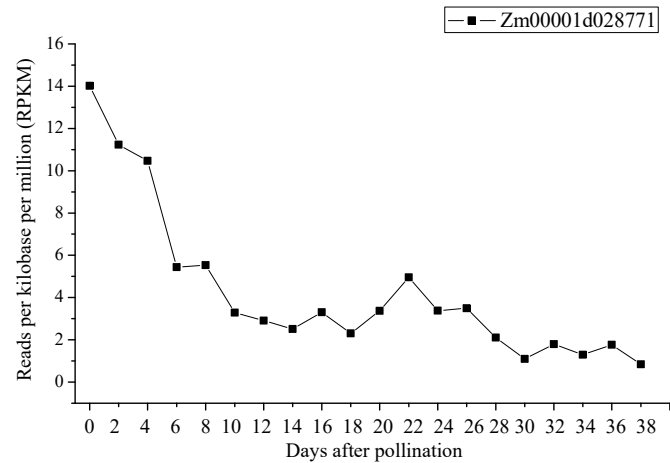

Supplement: PBI-18-207-s004.pdf [file PBI-18-207-s004.pdf]
